# Supplementary material for: Combined Low Densities of FoxP3+ and CD3+ Tumor-Infiltrating Lymphocytes Identify Stage II Colorectal Cancer at High Risk of Progression
Source: Oxford University Press journal article supplement (doi:10.1158/2326-6066.cir-18-0661), 2019-02-25
Supplement: 23266066cir180661-sup-208994_2_supp_5273210_pl61br.docx [file 23266066cir180661-sup-208994_2_supp_5273210_pl61br.docx]

**Supplementary** **Table 1. Densities of FoxP3+ and CD3+ TILs in 413 stage II-III CRC, by clinical-pathological variables.**

|  | | | | |  | **FoxP3+ TILs** **IRA%** | | |  | **CD3+ TILs** **IRA%** | | |
| --- | --- | --- | --- | --- | --- | --- | --- | --- | --- | --- | --- | --- |
|  | | | n | (%) |  | median | 2nd-3rd quartile | p a |  | median | 2nd-3rd quartile | p a |
|  | | |  |  |  |  |  |  |  |  |  |  |
| **ALL CASES** | | | 413 | (100) |  | 0.37 | 0.13-0.68 | - |  | 2.42 | 0.92-5.78 | - |
|  |  | |  |  |  |  |  |  |  |  |  |  |
| **PATIENT DEMOGRAPHICS** | | |  |  |  |  |  |  |  |  |  |  |
|  |  | |  |  |  |  |  |  |  |  |  |  |
| **Age at Diagnosis** | ≥ 70 yrs. | | 190 | (46.0) |  | 0.32 | 0.09-0.63 |  |  | 2.51 | 0.92-5.71 |  |
| < 70 yrs. | | 223 | (54.0) |  | 0.39 | 0.19-0.70 | .06 |  | 2.37 | 0.92-6.06 | .75 |
|  |  | |  |  |  |  |  |  |  |  |  |  |
| **Gender** | male | | 239 | (57.9) |  | 0.35 | 0.12-0.64 |  |  | 2.33 | 0.90-5.17 |  |
| female | | 174 | (42.1) |  | 0.38 | 0.16-0.74 | .25 |  | 2.66 | 1.02-6.17 | .23 |
|  |  | |  |  |  |  |  |  |  |  |  |  |
| **TUMOR FEATURES** | | |  |  |  |  |  |  |  |  |  |  |
|  |  | |  |  |  |  |  |  |  |  |  |  |
| **MS-Status** | MSS | | 347 | (84.0) |  | 0.39 | 0.16-0.74 |  |  | 1.96 | 0.86-5.03 |  |
| MSI | | 66 | (16.0) |  | 0.22 | 0.00-0.47 | <.001 |  | 5.69 | 2.48-10.9 | <.001 |
|  |  | |  |  |  |  |  |  |  |  |  |  |
| **Site** c | proximal | | 162 | (39.2) |  | 0.35 | 0.12-0.61 |  |  | 3.38 | 1.13-7.40 |  |
| distal | | 251 | (60.8) |  | 0.38 | 0.13-0.77 | .24 |  | 1.86 | 0.82-4.94 | <.001 |
|  |  | |  |  |  |  |  |  |  |  |  |  |
| **Stage** | II | | 211 | (51.1) |  | 0.35 | 0.12-0.62 |  |  | 2.56 | 1.04-6.13 |  |
| III all | | 202 | (48.9) |  | 0.39 | 0.14-0.75 | .21 |  | 2.35 | 0.88-5.59 | .28 |
|  |  | N1 | 131 | (31.7) |  | 0.42 | 0.19-0.81 | .06 |  | 2.61 | 0.88-5.90 | .79 |
|  |  | N2 | 71 | (17.2) |  | 0.31 | 0.00-0.61 | .76 |  | 2.14 | 0.78-3.74 | .07 |
|  |  | |  |  |  |  |  |  |  |  |  |  |
| **Local Invasion** | pT3 | | 365 | (88.4) |  | 0.38 | 0.14-0.69 |  |  | 2.48 | 0.92-5.78 |  |
| pT4 | | 48 | (11.6) |  | 0.30 | 0.00-0.51 | .12 |  | 2.10 | 1.05-5.80 | .73 |
|  |  | |  |  |  |  |  |  |  |  |  |  |
| **No. of  Lymph Nodes** d | < 12 | | 43 | (10.4) |  | 0.28 | 0.10-0.52 |  |  | 2.09 | 0.96-3.21 |  |
| ≥ 12 | | 363 | (87.9) |  | 0.38 | 0.14-0.69 | .17 |  | 2.63 | 0.92-5.87 | .49 |
|  |  | |  |  |  |  |  |  |  |  |  |  |
| **Grade** e | G1/G2 | | 336 | (81.4) |  | 0.38 | 0.14-0.70 |  |  | 2.24 | 0.90-5.69 |  |
| G3 | | 77 | (18.6) |  | 0.32 | 0.10-0.51 | .07 |  | 3.34 | 1.04-5.93 | .23 |
|  |  | |  |  |  |  |  |  |  |  |  |  |
| **Cell Type** | adenocarcinoma | | 376 | (91.0) |  | 0.38 | 0.16-0.70 |  |  | 2.45 | 0.92-5.73 |  |
| variants f | | 37 | (9.0) |  | 0.14 | 0.00-0.41 | <.001 |  | 2.33 | 0.66-5.80 | .77 |
|  |  | |  |  |  |  |  |  |  |  |  |  |
| **Angio-invasion** | no | | 318 | (77.0) |  | 0.38 | 0.14-0.69 |  |  | 2.24 | 0.90-5.82 |  |
| yes | | 95 | (23.0) |  | 0.31 | 0.10-0.54 | .15 |  | 2.67 | 1.02-5.67 | .71 |
|  |  | |  |  |  |  |  |  |  |  |  |  |
| a at Wilcoxon-Mann-Whitney test b p =.002 <50 yrs. *vs.* 50-69 yrs. c to splenic flexure d not assessable in 7 cases e G1/G2, well-to moderately differentiated cancers; G3, poorly differentiated f mucinous histology, signet ring, or medullary type | | | | | | | | | | | | |
