# Supplementary material for: Combined Low Densities of FoxP3+ and CD3+ Tumor-Infiltrating Lymphocytes Identify Stage II Colorectal Cancer at High Risk of Progression
Source: Oxford University Press journal article supplement (doi:10.1158/2326-6066.cir-18-0661), 2019-02-25
Supplement: 23266066cir180661-sup-208994_2_supp_5273212_pl61br.docx [file 23266066cir180661-sup-208994_2_supp_5273212_pl61br.docx]

**
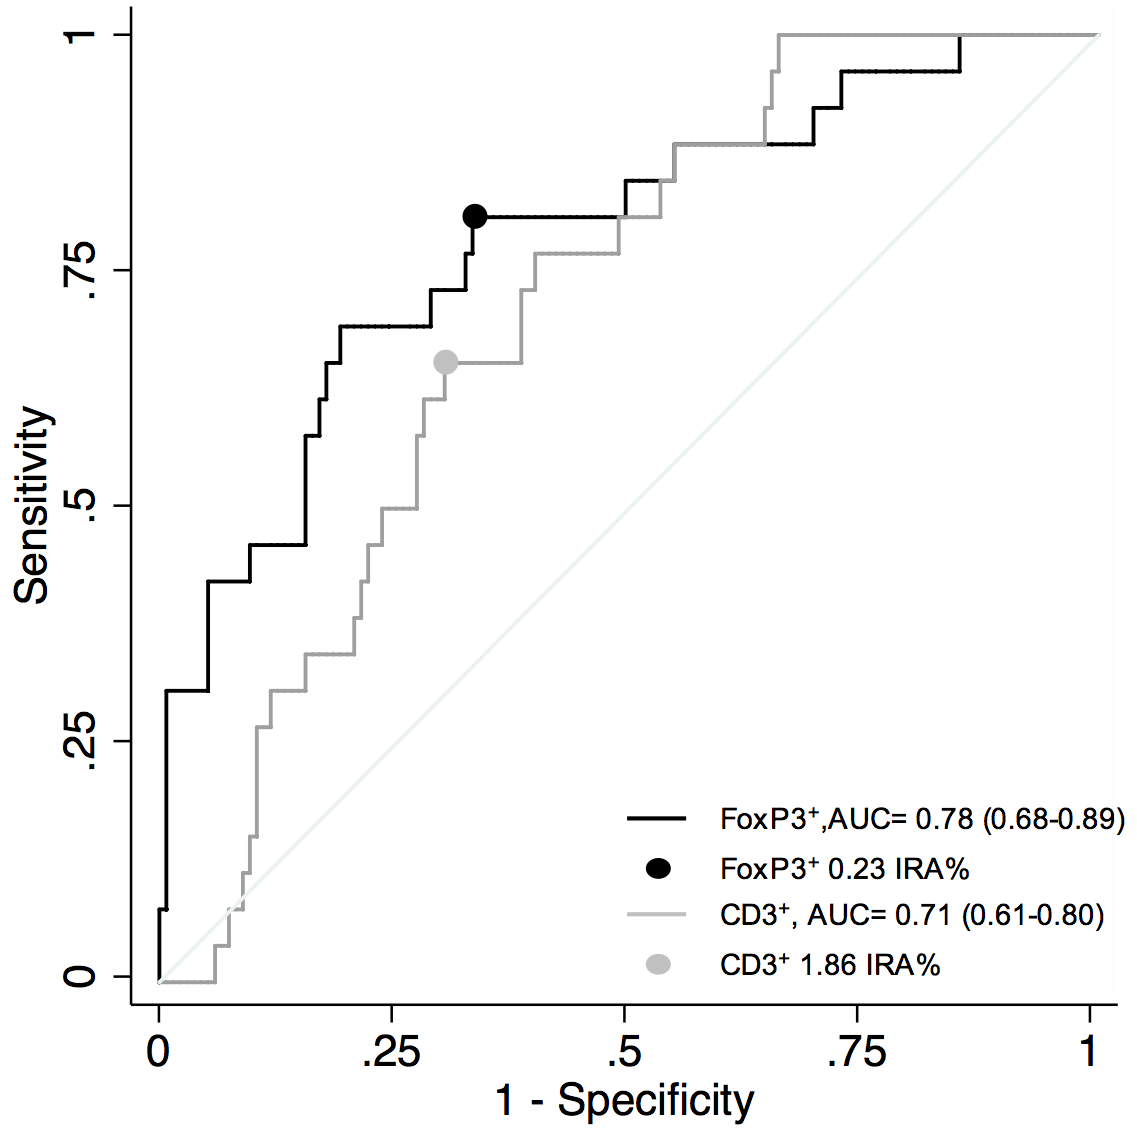
Supplementary Figure 1. ROC curves for densities of FoxP3+ and CD3+ TILs as predictors of postsurgical recurrence in patients with stage II MSS CRC, validation set.** FoxP3+ TILs: AUC, 0.78 (bootstrap standard error, 0.05; 95%CI, 0.68-0.89) at cutoff surface of 0.23 IRA%, sensitivity, 0.81; specificity, 0.61. CD3+ TILs: AUC, 0.71 (bootstrap standard error, 0.05; 95%CI, 0.61-0.80); at cutoff 1.86 IRA%, sensitivity, 0.66; specificity, 0.62.
